# Supplementary material
Source: Royal Society of Chemistry journal article supplement (doi:10.1039/d6tc00366d)
Supplement: d6tc00366d1.pdf [file d6tc00366d1.pdf]

## Two magnesium based metal-organic frameworks (Mg-MOFs): Structures, photochromism, and fluorescence sensing to Fe<sup>3+</sup> ions and cysteine molecules

Zhao-Feng Wu,<sup>\*,a</sup> Bin Tan,<sup>b</sup> Jin-Mei Liu,<sup>c</sup> Can Peng,<sup>c</sup> Abdusalam Ablez,<sup>c</sup> Xiu-Ze Hei,<sup>\*,d</sup> Ning-Kun Zhang,<sup>e</sup> Yi-Xuan Gao,<sup>a</sup> Ru-Ping Liu,<sup>\*,a</sup> Xiao-Ying Huang<sup>a</sup>

<sup>a</sup> Beijing Institute of Graphic Communication, Daxing District, Beijing, 102600, P. R. China.

<sup>b</sup> School of Chemistry and Chemical Engineering, Beijing Institute of Technology, Beijing 102488, P. R. China

<sup>c</sup> Fujian Institute of Research on the Structure of Matter, The Chinese Academy of Sciences, Fuzhou, Fujian, 350002, P. R. China

<sup>d</sup> Hoffmann Institute of Advanced Materials, Shenzhen Polytechnic University, Nanshan District, Shenzhen 518055, P. R. China.

<sup>e</sup> College of Traditional Chinese Medicine, Fujian University of Traditional Chinese Medicine, Fuzhou, Fujian, 350100, P. R. China

**Table S1** Crystallographic data and structural refinement details

| Compounds                                                                                                      | <b>1</b>                                                                             | <b>2</b>                                                                            |
|----------------------------------------------------------------------------------------------------------------|--------------------------------------------------------------------------------------|-------------------------------------------------------------------------------------|
| Empirical formula                                                                                              | C <sub>36</sub> H <sub>36.11</sub> Mg <sub>2</sub> N <sub>2</sub> O <sub>15.05</sub> | C <sub>34</sub> H <sub>34.5</sub> Mg <sub>2</sub> N <sub>4</sub> O <sub>15.25</sub> |
| CCDC number                                                                                                    | 2527599                                                                              | 2527600                                                                             |
| Formula weight                                                                                                 | 786.23                                                                               | 791.77                                                                              |
| Crystal system                                                                                                 | monoclinic                                                                           | Monoclinic                                                                          |
| Space group                                                                                                    | <i>P</i> 2 <sub>1</sub> / <i>c</i>                                                   | <i>P</i> 2 <sub>1</sub> / <i>c</i>                                                  |
| <i>T</i> /K                                                                                                    | 100(2)                                                                               | 100(2)                                                                              |
| <i>a</i> /Å                                                                                                    | 14.7942(4)                                                                           | 14.9938(4)                                                                          |
| <i>b</i> /Å                                                                                                    | 17.2223(4)                                                                           | 16.9392(5)                                                                          |
| <i>c</i> /Å                                                                                                    | 14.5709(4)                                                                           | 14.4824(4)                                                                          |
| $\alpha$ /°                                                                                                    | 90                                                                                   | 90                                                                                  |
| $\beta$ /°                                                                                                     | 90.156(2)                                                                            | 90.481(2)                                                                           |
| $\gamma$ /°                                                                                                    | 90                                                                                   | 90                                                                                  |
| <i>V</i> /Å <sup>3</sup>                                                                                       | 3712.51(17)                                                                          | 3678.15(18)                                                                         |
| <i>Z</i>                                                                                                       | 4                                                                                    | 4                                                                                   |
| $\rho_{\text{calc}}$ g/cm <sup>3</sup>                                                                         | 1.407                                                                                | 1.430                                                                               |
| $\mu$ /mm <sup>-1</sup>                                                                                        | 0.140                                                                                | 0.143                                                                               |
| <i>F</i> (000)                                                                                                 | 1642                                                                                 | 1650                                                                                |
| <i>R</i> <sub>int</sub>                                                                                        | 0.0271                                                                               | 0.0256                                                                              |
| GOF                                                                                                            | 1.052                                                                                | 1.046                                                                               |
| <sup>a</sup> <i>R</i> <sub>1</sub> , <sup>b</sup> <i>wR</i> <sub>2</sub> [ <i>I</i> > 2 $\sigma$ ( <i>I</i> )] | 0.0419, 0.1037                                                                       | 0.0471, 0.1326                                                                      |
| <sup>a</sup> <i>R</i> <sub>1</sub> , <sup>b</sup> <i>wR</i> <sub>2</sub> (all data)                            | 0.0561, 0.1101                                                                       | 0.0581, 0.1393                                                                      |

$$^a R_1 = \sum \| |F_o| - |F_c| \| / \sum |F_o| \cdot ^b wR_2 = [ \sum w(F_o^2 - F_c^2)^2 / \sum w(F_o^2)^2 ]^{1/2}$$

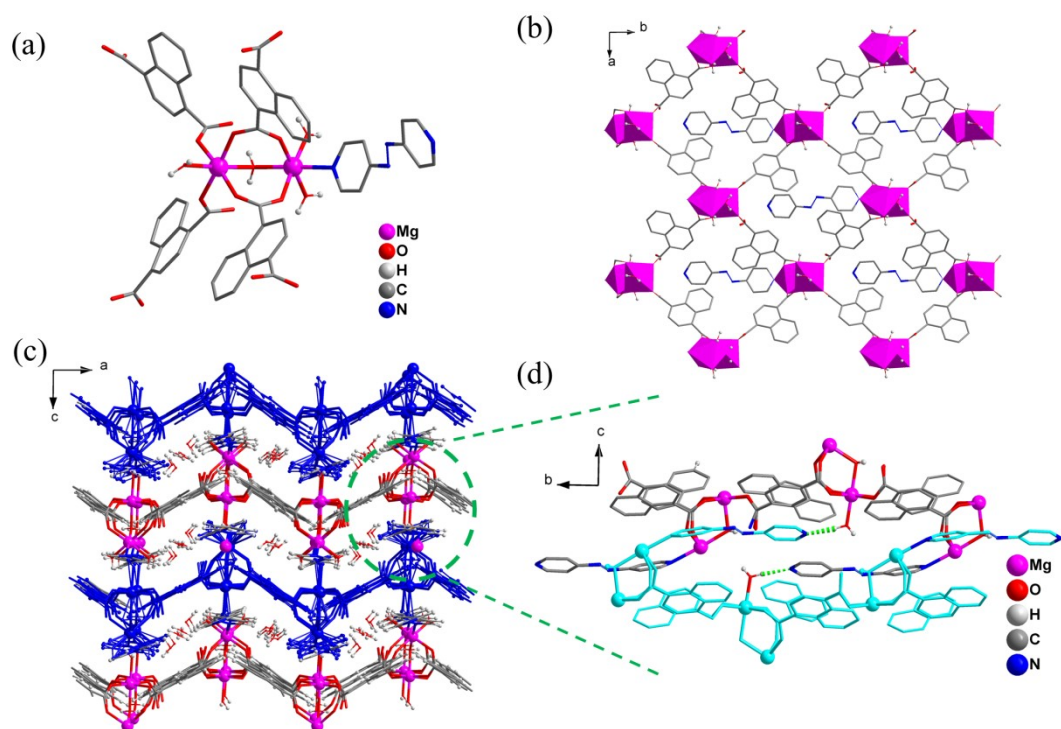

**Figure 1.** (a) The coordination environment of  $\text{Mg}^{2+}$  in compound **2**. (b) The 2D plane formed by  $\text{Mg}^{2+}$  and 1,4-NDC $^{2-}$ . (c) The 3D super framework formed by stacking the layers. (d) The H-bonding between the terminal water and L2 ligand from two layers in compound **2**.

**Table S2.** Hydrogen bonds in compound **1**.

| D-H...A                | D (D-H)/Å | D (H...A)/Å | D (D...A)/Å |
|------------------------|-----------|-------------|-------------|
| O(9)-H(9C)...O(7)#1    | 0.852(8)  | 1.761(10)   | 2.5848(14)  |
| O(10)-H(10B)...O(8)#3  | 0.826(9)  | 1.992(9)    | 2.8175(13)  |
| O(10)-H(10C)...O(3W)   | 0.837(9)  | 1.917(10)   | 2.7447(16)  |
| O(11)-H(11B)...O(3)#6  | 0.834(9)  | 1.836(10)   | 2.6541(13)  |
| O(11)-H(11C)...O(1W)   | 0.848(9)  | 1.984(10)   | 2.8072(16)  |
| O(12)-H(12B)...N(2)#7  | 0.842(8)  | 1.880(9)    | 2.7192(15)  |
| O(12)-H(12C)...O(11)#8 | 0.825(9)  | 2.216(11)   | 2.9335(14)  |
| C(1)-H(1A)...O(4W)     | 0.95      | 2.37        | 3.04(3)     |
| C(9)-H(9A)...O(2W)#3   | 0.95      | 2.62        | 3.524(2)    |
| O(1W)-H(1B)...O(4)#2   | 0.840(9)  | 1.896(10)   | 2.7232(17)  |
| O(2W)-H(2B)...O(7)#1   | 0.847(9)  | 1.935(11)   | 2.7671(17)  |
| O(2W)-H(2C)...O(12)#9  | 0.852(9)  | 2.478(17)   | 3.1579(16)  |
| O(3W)-H(3B)...O(2W)    | 0.840(9)  | 1.977(10)   | 2.8035(18)  |
| O(4W)-H(4B)...O(3W)#3  | 0.820(10) | 2.02(19)    | 2.78(3)     |

Symmetry transformations used to generate equivalent atoms:

#1  $-x, y-1/2, -z+1/2$ ; #2  $-x+1, y-1/2, -z+1/2$ ; #3  $-x, -y+1, -z+1$ ; #4  $-x+1, y+1/2, -z+1/2$ ; #5  $-x, y+1/2, -z+1/2$ ; #6  $-x+1, -y+1, -z+1$ ; #7  $x, -y+3/2, z-1/2$ ; #8  $x, -y+1/2, z-1/2$ ; #9  $x, -y+1/2, z+1/2$ .

**Table S3.** Hydrogen bonds in compound **2**.

| D-H...A                            | D (D-H)/Å | D (H...A)/Å | D (D...A)/Å |
|------------------------------------|-----------|-------------|-------------|
| O(9)-H(9A)...O(7)#2                | 0.839(9)  | 2.59(2)     | 2.9835(15)  |
| O(9)-H(9A)...O(8)#2                | 0.839(9)  | 1.792(11)   | 2.6135(17)  |
| O(10)-H(10A)...N(2)#5              | 0.824(9)  | 1.932(9)    | 2.753(2)    |
| O(10)-H(10B)...O(11)#6             | 0.816(9)  | 2.274(12)   | 2.9683(17)  |
| O(11)-H(11A)...O(7)#7              | 0.831(9)  | 1.845(11)   | 2.6571(16)  |
| O(11)-H(11B)...O(3W)#7             | 0.847(9)  | 1.963(11)   | 2.795(2)    |
| O(12)-H(12A)...O(2W)               | 0.841(9)  | 1.854(10)   | 2.693(2)    |
| O(12)-H(12B)...O(4)#8              | 0.829(9)  | 1.956(9)    | 2.7842(16)  |
| C(36)-H(36A)...O(1W)#3             | 0.95      | 2.53        | 3.450(3)    |
| O(1W)-H(1A)...O(10)                | 0.872(10) | 2.52(3)     | 3.208(2)    |
| O(1W)-H(1B)...O(3 <sup>a</sup> )#9 | 0.869(10) | 1.893(14)   | 2.748(4)    |
| O(1W)-H(1B)...O(3 <sup>b</sup> )#9 | 0.869(10) | 1.90(2)     | 2.698(8)    |
| O(2W)-H(2B)...O(3 <sup>b</sup> )#1 | 0.836(10) | 2.64(3)     | 3.051(9)    |
| O(2W)-H(2B)...O(1W)#10             | 0.836(10) | 2.038(14)   | 2.848(3)    |
| O(3W)-H(3C)...O(8)#11              | 0.827(10) | 1.980(13)   | 2.788(3)    |

Symmetry transformations used to generate equivalent atoms:

#1  $-x+1,y+1/2,-z+1/2$ ; #2  $-x,y+1/2,-z+1/2$ ; #3  $-x+1,y-1/2,-z+1/2$ ; #4  $-x,y-1/2,-z+1/2$ ; #5  $x,-y+1/2,z-1/2$ ; #6  $x,-y+3/2,z-1/2$ ; #7  $-x,-y+1,-z+1$ ; #8  $-x+1,-y+1,-z+1$ ; #9  $-x+1,-y+1,-z$ ; #10  $x,-y+3/2,z+1/2$ ; #11  $x,-y+1/2,z+1/2$ .

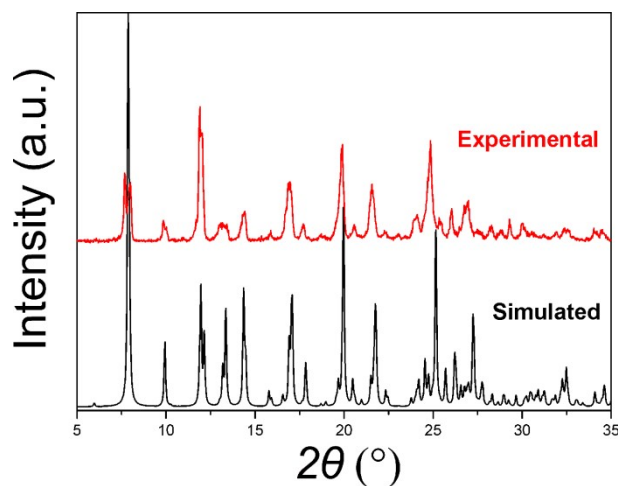**Figure S2.** The PXRD of the as-made compound **1**.

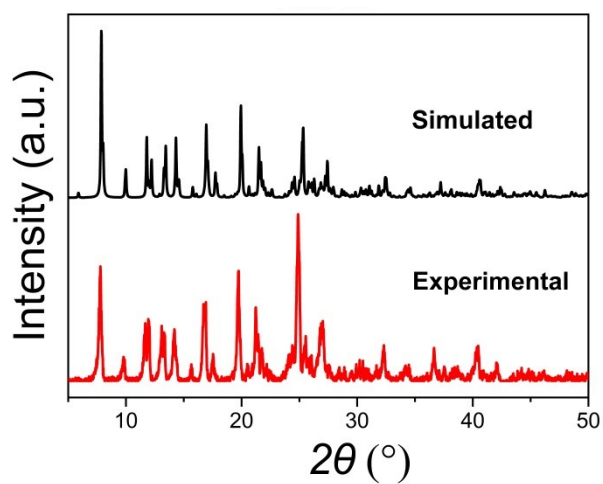

**Figure S3.** The PXR D of the as-made compound **2**.

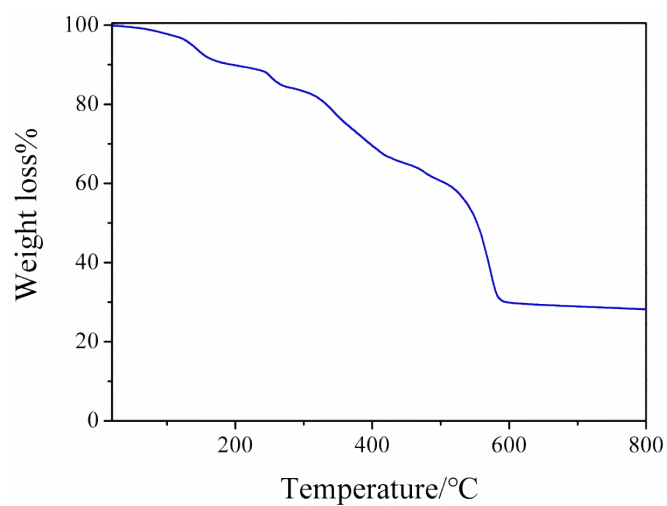

**Figure S4.** The TG curve for the as-made compound **1**.

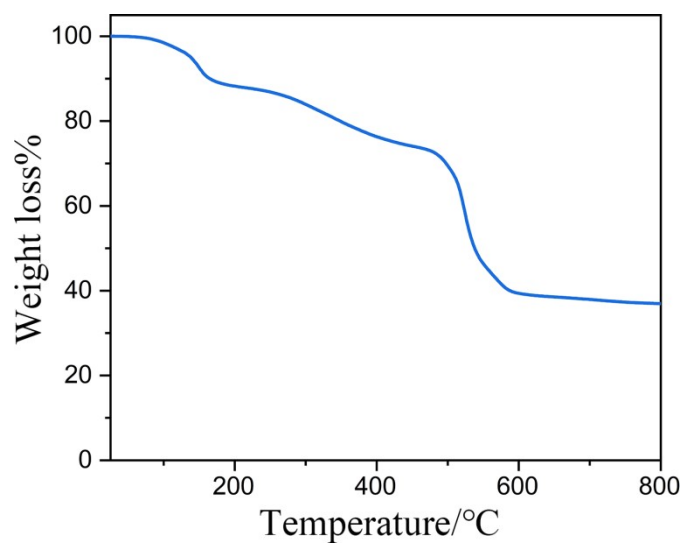

**Figure S5.** The TG curve for the as-made compound **2**.

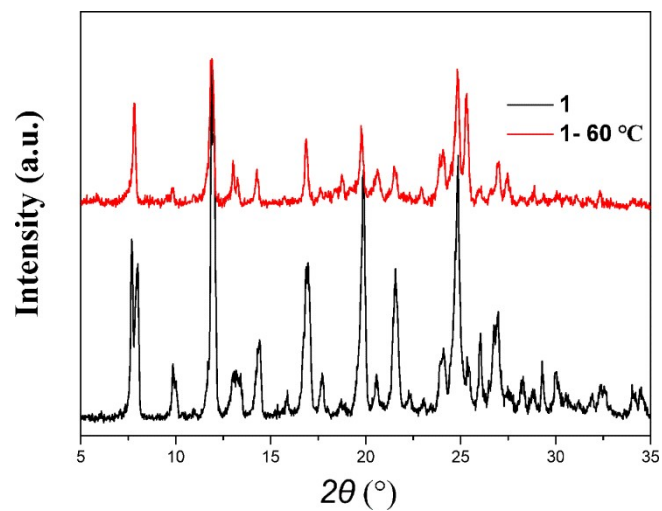

**Figure S6.** The PXRD of the as-made **1** and photochromic sample after 60 °C heating.

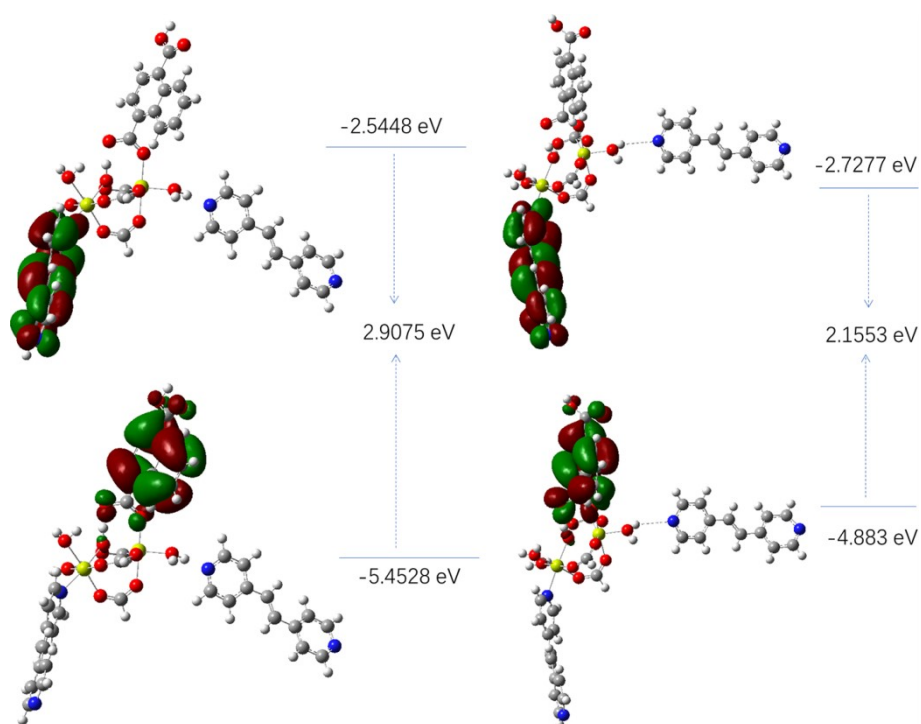

**Fig. S7.** DFT calculation of the selected structural fragment of compound **1** before and after hydrogen migration.

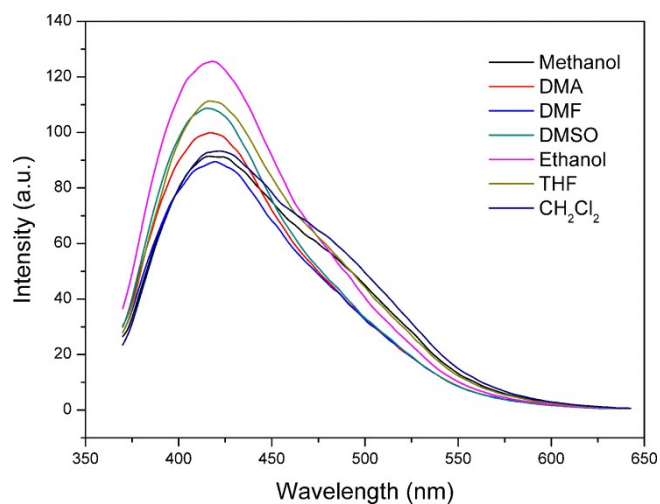

**Figure S8.** The fluorescence spectra for the powdered compound **1** dispersed in varied solvents.

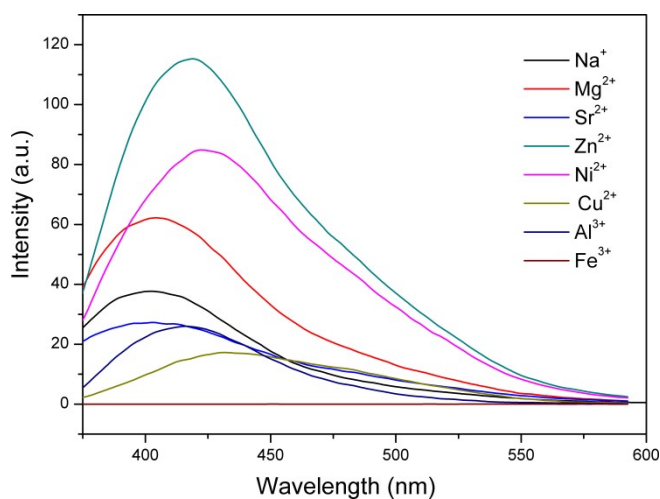

**Figure S9.** The fluorescence spectra for the powdered compound **1** dispersed in varied ethanol solution of  $10^{-2}$  M metal ions.

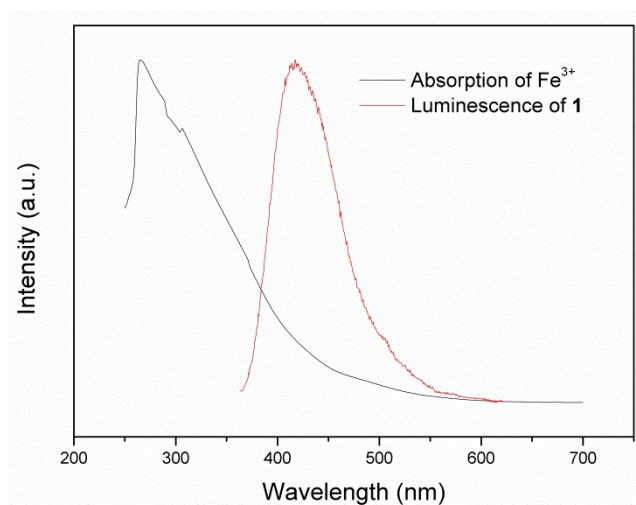

**Figure S10.** The absorption spectra of the  $\text{Fe}^{3+}$  solution and the luminescence of compound **1**.

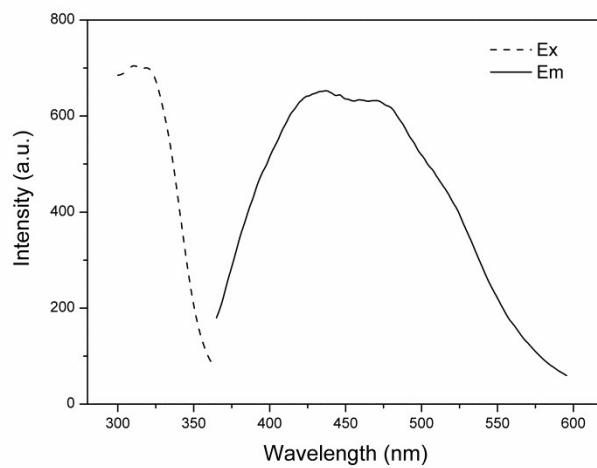

**Figure S11.** The solid state fluorescence spectra for the compound **1-CuI**.

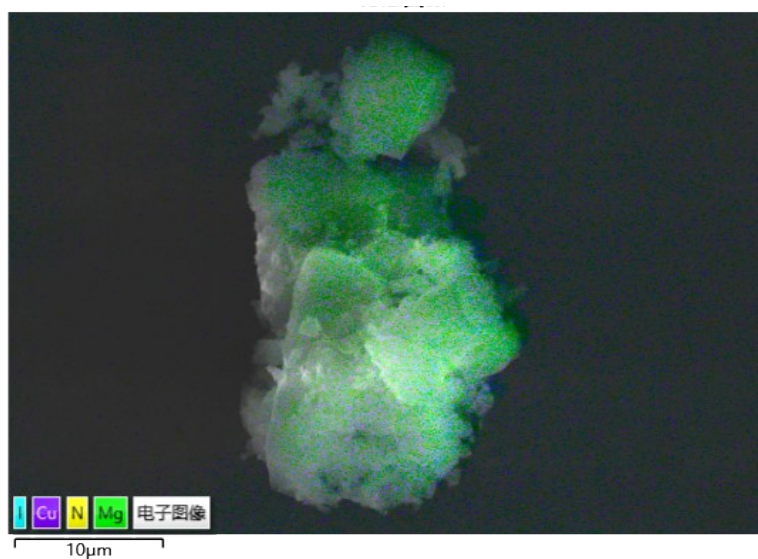

**Figure S12.** The SEM photograph for the sample **1-CuI**.

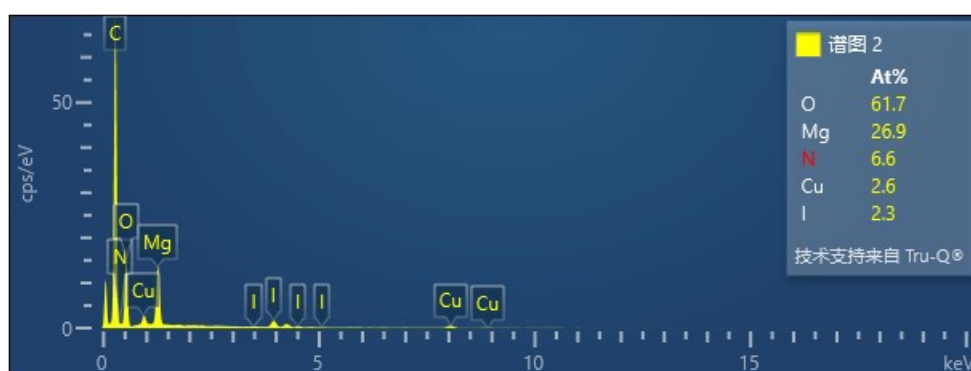

**Figure S13.** The EDS result of the sample **1-CuI**.

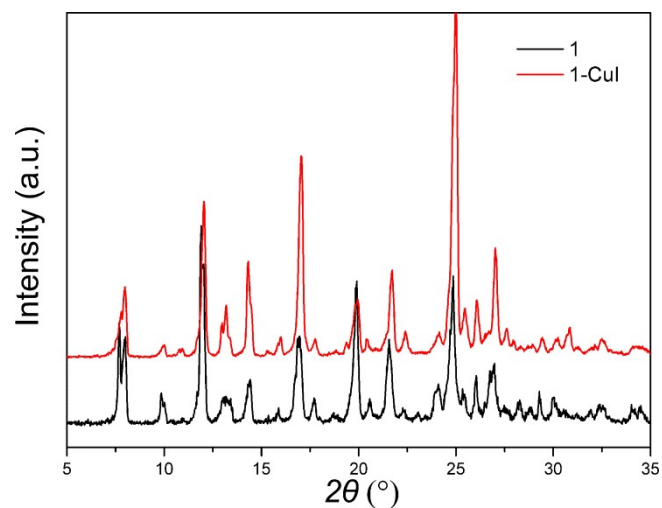

**Figure S14.** The PXRD of the as-made **1-CuI**. The experimental pattern for the pristine **1** was added for a comparative study.

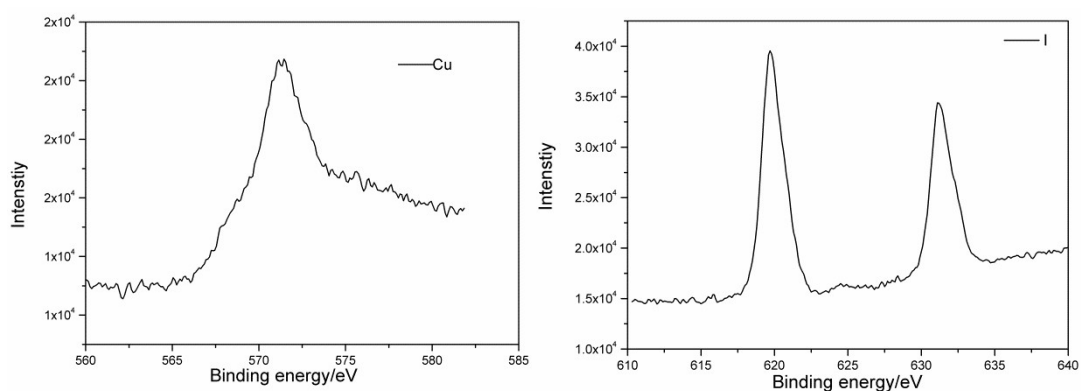

**Figure S15.** The core-level spectra of Cu and I in compound **1-CuI**.

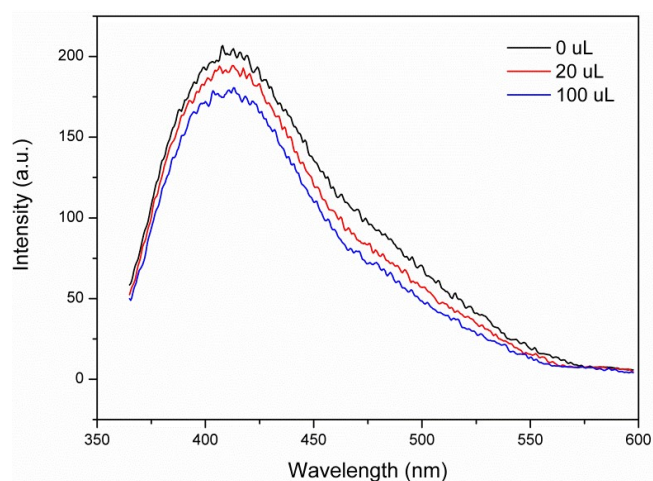

**Figure S16.** The fluorescence spectra for the ethanol suspension of compound **1** with the addition of varied concentration of Cys.
